# Supplementary material for: Design principles from multiscale simulations to predict nanostructure in self-assembling ionic liquids
Source: Royal Society of Chemistry journal article supplement (doi:10.1039/c7fd00154a), 2017-07-18
Supplement: c7fd00154a1.pdf [file c7fd00154a1.pdf]

## Electronic Supporting Information For:

### Design principles and multiscale simulations for determining nanostructure in self-assembling ionic liquids

Benjamin T. Nebgen<sup>1,2§\*</sup>, Harsha D. Magurudeniya<sup>1§</sup>, Kevin Kwock<sup>1‡</sup>, Bryan Ringstrand<sup>1</sup>, Towfiq Ahmed<sup>2</sup>, Sönke Seifert<sup>3</sup>, Jian-Xin Zhu<sup>1,2</sup>, Sergei Tretiak<sup>1,2</sup>, and Millicent A. Firestone<sup>1,\*</sup>

<sup>1</sup>Center for Integrated Nanotechnologies, Los Alamos National Laboratory, Los Alamos, NM USA 87545

<sup>2</sup>Theoretical Division, Los Alamos National Laboratory, Los Alamos, NM USA 87545

<sup>3</sup>X-ray Sciences Division, Argonne National Laboratory, Lemont, IL USA 60439

### Table of Contents.

|                                                                                              |          |
|----------------------------------------------------------------------------------------------|----------|
| 1. Comparison of force field parameters.....                                                 | Table S1 |
| 2. Mean Squared Displacement (MSD) vs. time for MD simulation.....                           | Fig. S1  |
| 3. Table of simulated and experimental water self-diffusion coefficients.....                | Table S2 |
| 4. ATR/FT-IR of C <sub>10</sub> mim <sup>+</sup> NO <sub>3</sub> <sup>-</sup> .....          | Fig. S2A |
| 5. <sup>1</sup> H NMR of C <sub>10</sub> mim <sup>+</sup> NO <sub>3</sub> <sup>-</sup> ..... | Fig. S2B |
| <sup>13</sup> C NMR of C <sub>10</sub> mim <sup>+</sup> NO <sub>3</sub> <sup>-</sup> .....   | Fig. S2C |
| 6. ATR/FT-IR C <sub>10</sub> mim <sup>+</sup> SCN <sup>-</sup> .....                         | Fig. S3A |
| 7. <sup>1</sup> H NMR of C <sub>10</sub> mim <sup>+</sup> SCN <sup>-</sup> .....             | Fig. S3B |
| <sup>13</sup> C NMR of C <sub>10</sub> mim <sup>+</sup> SCN <sup>-</sup> .....               | Fig. S3C |
| 8. TGA of C <sub>10</sub> mim <sup>+</sup> SCN <sup>-</sup> .....                            | Fig. S4A |
| DSC of C <sub>10</sub> mim <sup>+</sup> SCN <sup>-</sup> .....                               | Fig. S4B |
| 9. TGA of C <sub>10</sub> mim <sup>+</sup> NO <sub>3</sub> <sup>-</sup> .....                | Fig. S5A |
| DSC of C <sub>10</sub> mim <sup>+</sup> NO <sub>3</sub> <sup>-</sup> .....                   | Fig. S5B |
| 10. TGA of C <sub>10</sub> mim <sup>+</sup> Cl <sup>-</sup> .....                            | Fig. S6A |
| DSC of C <sub>10</sub> mim <sup>+</sup> Cl <sup>-</sup> .....                                | Fig. S6B |

**Table S1:** Comparison force field parameters created by Liu, Huang, and Wang<sup>1</sup> to EFP and SAPT2+3 energies<sup>2</sup> for various imidazolium cations with the chloride anion. The EFP energy shown here is that obtained with the aug-cc-pVDZ basis set. Structures and energies for EFP and SAPT 2+3 can be found in reference 2. Structure abbreviations are the same as used in reference 2: dmim: dimethyl-imidazolium, emim: 1-methyl-3-ethyl-imidazolium, bmim: 1-methyl-3-butyl-imidazolium.

| Ion     | Con<br>f | Force Field<br>Energy<br>(kJ/mol) | EFP<br>Energy<br>(kJ/mol) | SAPT 2+3<br>Energy<br>(kJ/mol) | Force Field<br>Error (%) | EFP<br>Error<br>(%) |
|---------|----------|-----------------------------------|---------------------------|--------------------------------|--------------------------|---------------------|
| dmim    | 1        | 364.3                             | 414.1                     | 423.4                          | 14.0                     | 2.2                 |
| dmim    | 2        | 381.2                             | 437.7                     | 405.9                          | 6.1                      | 7.8                 |
| emim    | 1        | 380.9                             | 388.9                     | 413.4                          | 7.9                      | 5.9                 |
| emim    | 2        | 396.4                             | 408.6                     | 409.7                          | 3.3                      | 0.3                 |
| emim    | 3        | 392.5                             | 405.6                     | 405.4                          | 3.2                      | 0.0                 |
| emim    | 4        | 382.0                             | 406.4                     | 418.2                          | 8.6                      | 2.8                 |
| bmim    | 1        | 375.0                             | 383.4                     | 411.6                          | 8.9                      | 6.9                 |
| bmim    | 2        | 391.6                             | 380.4                     | 408.1                          | 4.0                      | 6.8                 |
| bmim    | 3        | 387.3                             | 410.6                     | 406.5                          | 4.7                      | 1.0                 |
| bmim    | 4        | 377.1                             | 411.6                     | 419.3                          | 10.1                     | 1.8                 |
| Average |          |                                   |                           |                                | 7.1                      | 3.6                 |

1. Z. P. Liu, S. P. Huang and W. C. Wang, *J Phys Chem B*, 2004, **108**, 12978-12989.
2. S. Y. S. Tan and E. I. Izgorodina, *Journal of Chemical Theory and Computation*, 2016, **12**, 2553-2568.

**Table S2:** Table of simulated and experimental water self-diffusion coefficients. A temperature of 310 K was used for the production molecular dynamics simulations because the simulated value at that temperature matched the experimental self-diffusion coefficient at room temperature.

| Temperature (K) | Simulated Self Diffusion ( $\text{\AA}^2/\text{ps}$ ) | Experimental Self Diffusion ( $\text{\AA}^2/\text{ps}$ ) |
|-----------------|-------------------------------------------------------|----------------------------------------------------------|
| 288             | -                                                     | 0.176                                                    |
| 298             | -                                                     | 0.230                                                    |
| 300             | 0.170                                                 | -                                                        |
| 310             | 0.202                                                 | -                                                        |
| 323             | -                                                     | 0.398                                                    |
| 325             | 0.430                                                 | -                                                        |
|                 |                                                       |                                                          |

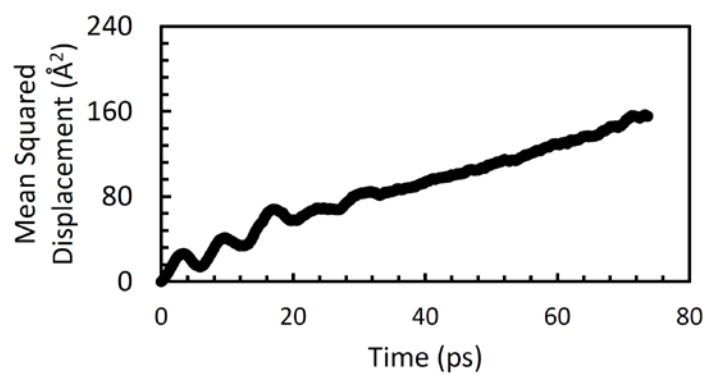

**Figure S1.** Mean squared displacement (MSD) vs. time for MD simulation

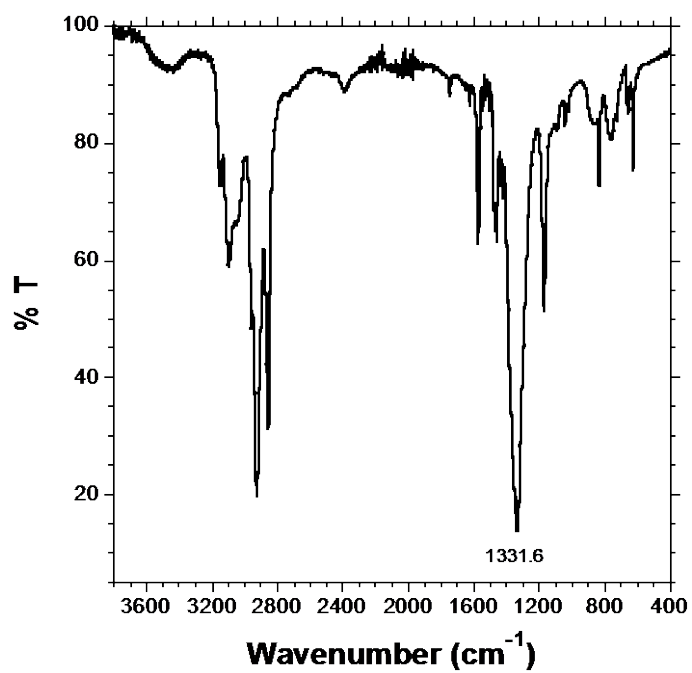

**Figure S2A.** ATR/FT-IR of dried 1-decyl-3-methylimidazolium nitrate,  $\text{C}_{10}\text{mim}^+\text{NO}_3^-$ , but still contains a residual 0.92% (w/w)  $\text{H}_2\text{O}$  as determined by TGA.

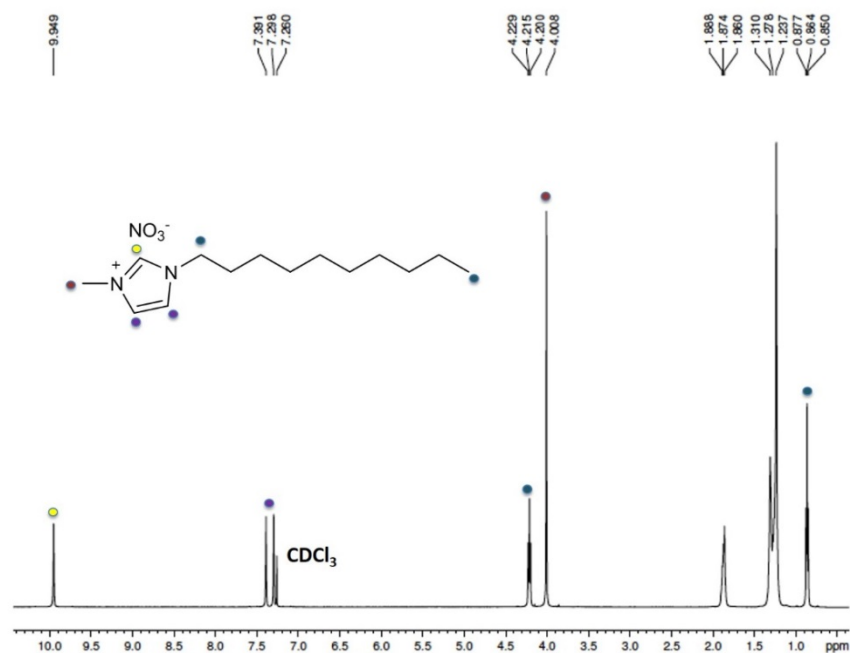

**Figure S2B.** <sup>1</sup>H NMR of dried 1-decyl-3-methylimidazolium nitrate, C<sub>10</sub>mim<sup>+</sup>NO<sub>3</sub><sup>-</sup> in CDCl<sub>3</sub>. (Sample contains a residual 0.92% (w/w) H<sub>2</sub>O, as determined by TGA).

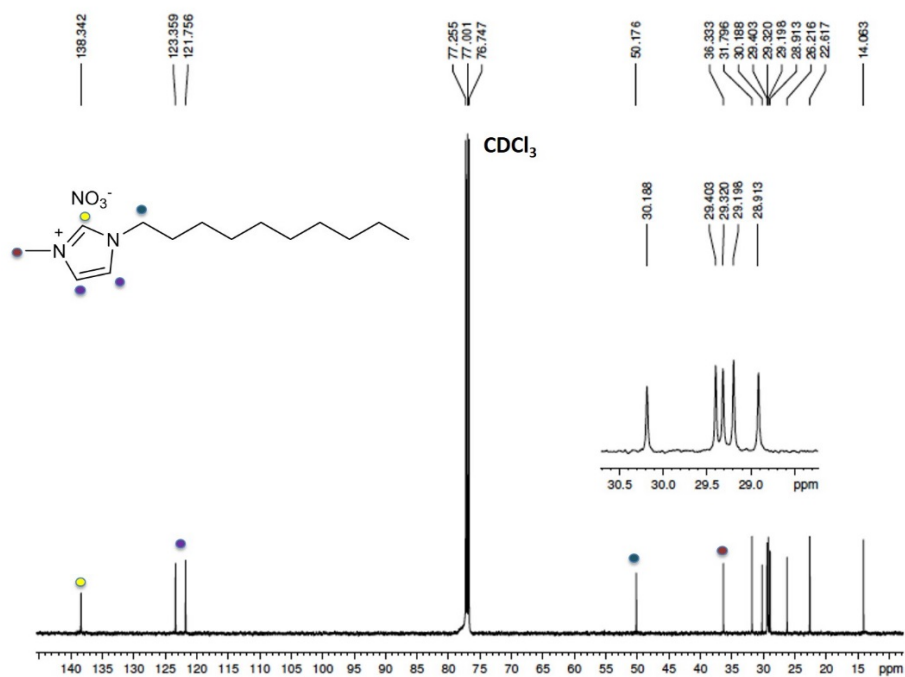

**Figure S2C.** <sup>13</sup>C NMR of dried 1-decyl-3-methylimidazolium nitrate, C<sub>10</sub>mim<sup>+</sup>NO<sub>3</sub><sup>-</sup> in CDCl<sub>3</sub>. (Sample contains a residual 0.92% (w/w) H<sub>2</sub>O as determined by TGA.)

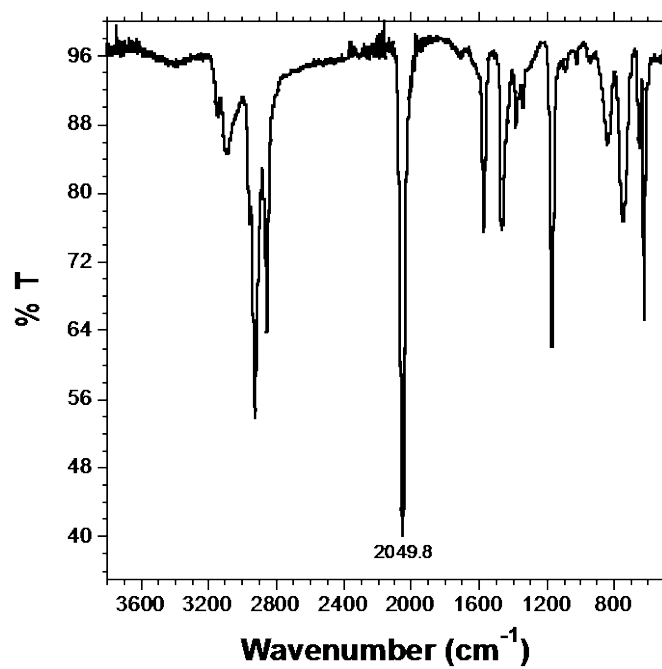

**Figure S3A.** ATR/FT-IR of dried -decyl-3-methylimidazolium thiocyanate,  $C_{10}mim^+SCN^-$ , but still contains a residual 4.9% (w/w)  $H_2O$  as determined by TGA.

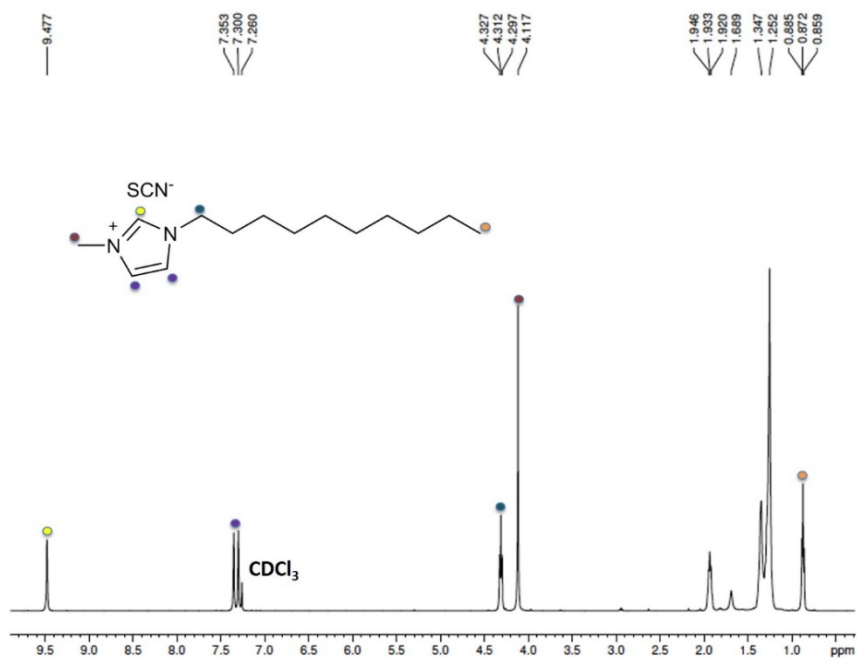

**Figure S3B.** <sup>1</sup>H NMR of dried 1-decyl-3-methylimidazolium thiocyanate, C<sub>10</sub>mim<sup>+</sup>SCN<sup>-</sup> in CDCl<sub>3</sub>. (Sample contains a residual 4.9% (w/w) H<sub>2</sub>O as determined by TGA.)

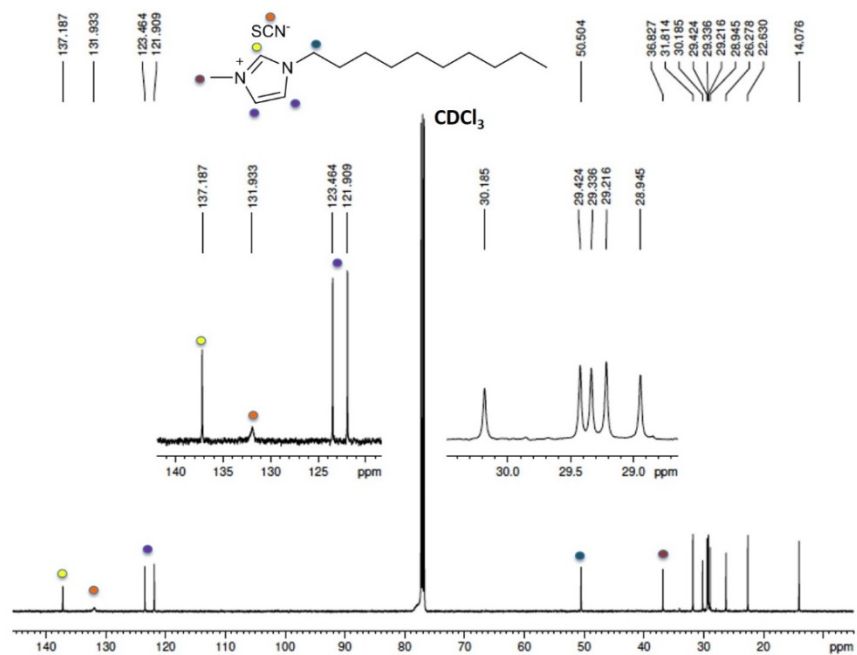

**Figure S3C.** <sup>13</sup>C NMR of dried 1-decyl-3-methylimidazolium thiocyanate, C<sub>10</sub>mim<sup>+</sup>SCN<sup>-</sup> in CDCl<sub>3</sub>. (Sample contains a residual 4.9% (w/w) H<sub>2</sub>O as determined by TGA.)



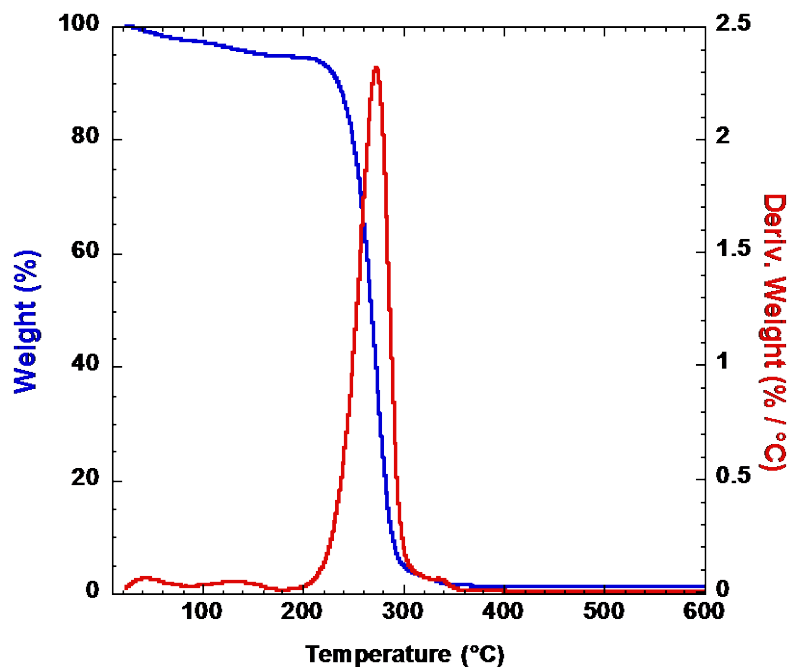

**Figure S4A.** Fast scan ( $5\text{ }^{\circ}\text{C min}^{-1}$ )  $\text{N}_2$  atmosphere TGA collected on dried 1-decyl-3-methylimidazolium thiocyanate,  $\text{C}_{10}\text{mim}^+\text{SCN}^-$ . Thermogram shows 4.9% (w/w)  $\text{H}_2\text{O}$  remains in the sample.

---

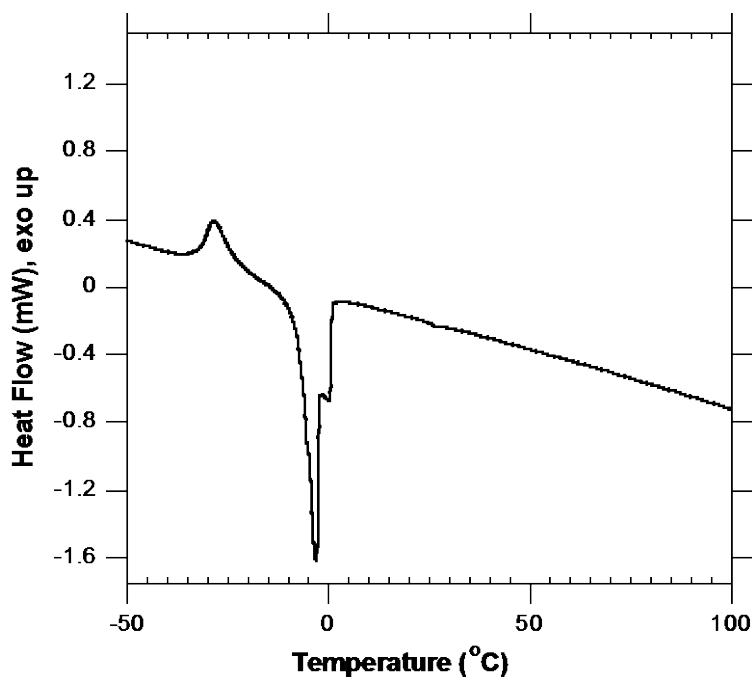

**Figure S4B.** The second heating DSC profile ( $2\text{ }^{\circ}\text{C/min}$ ) collected on dried 1-decyl-3-methylimidazolium thiocyanate,  $\text{C}_{10}\text{mim}^+\text{SCN}^-$ . (Sample contained 4.9% (w/w)  $\text{H}_2\text{O}$  in the sample as determined by TGA.) Heating scan shows a  $T_m = -6.74\text{ }^{\circ}\text{C}$ .

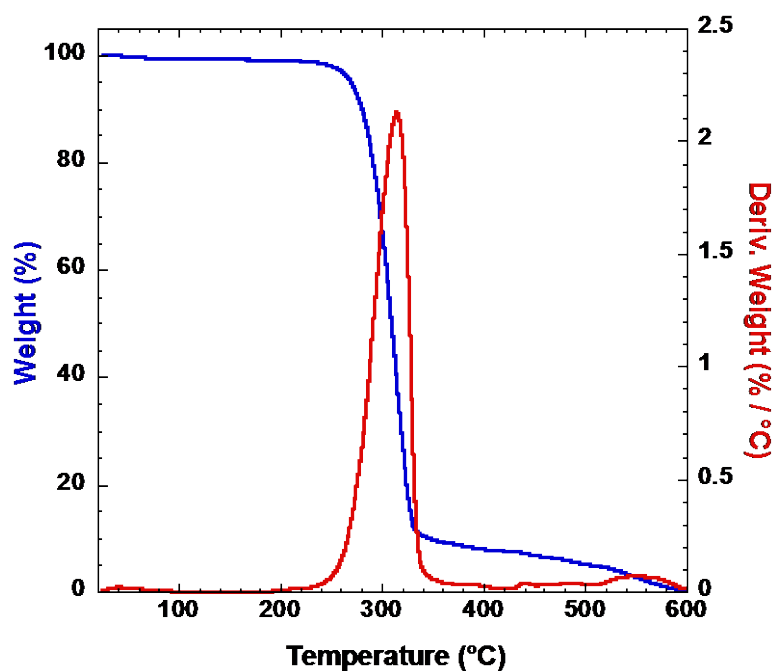

**Figure S5A.** Fast scan ( $5\text{ }^{\circ}\text{C min}^{-1}$ )  $\text{N}_2$  atmosphere TGA collected on dried 1-decyl-3-methylimidazolium nitrate,  $\text{C}_{10}\text{mim}^+\text{NO}_3^-$ . Thermogram shows a residual 0.92% (w/w)  $\text{H}_2\text{O}$  remains in the sample.

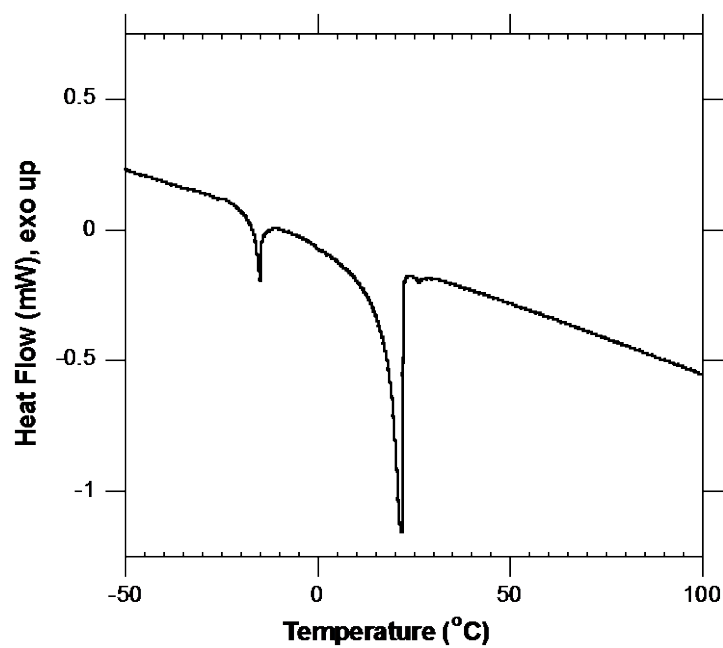

**Figure S5B.** The second heating DSC profile ( $2\text{ }^{\circ}\text{C/min}$ ) collected on dried (1-decyl-3-methylimidazolium nitrate,  $[\text{C}_{10}\text{mim}]^+[\text{NO}_3]^-$ ). (Sample contained 0.92% (w/w)  $\text{H}_2\text{O}$  in the sample as determined by TGA.) Heating scan shows a  $T_m = 17.8\text{ }^{\circ}\text{C}$ .

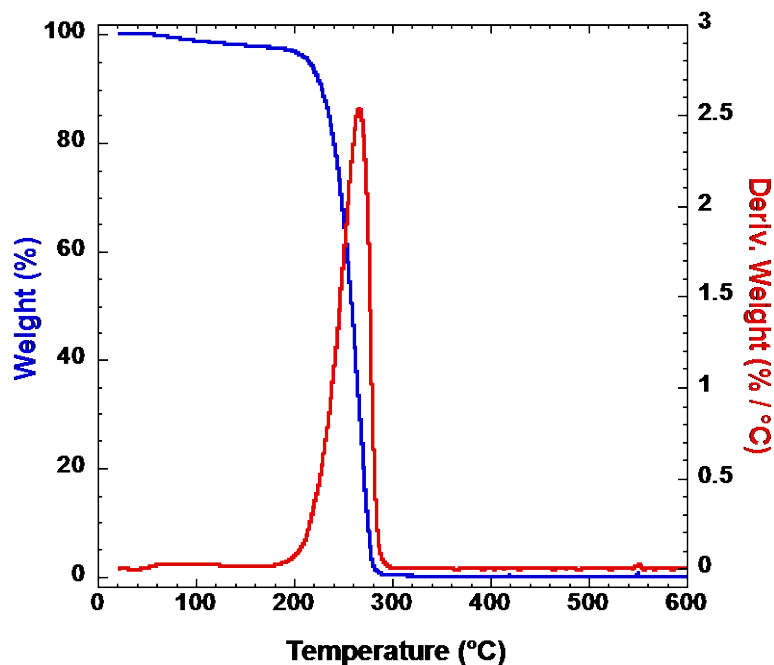

**Figure S6A.** Fast scan ( $5\text{ }^{\circ}\text{C min}^{-1}$ )  $\text{N}_2$  atmosphere TGA collected on dried 1-decyl-3-methylimidazolium chloride,  $\text{C}_{10}\text{mim}^+\text{Cl}^-$ . Thermogram shows 2% (w/w)  $\text{H}_2\text{O}$  remains in the sample.

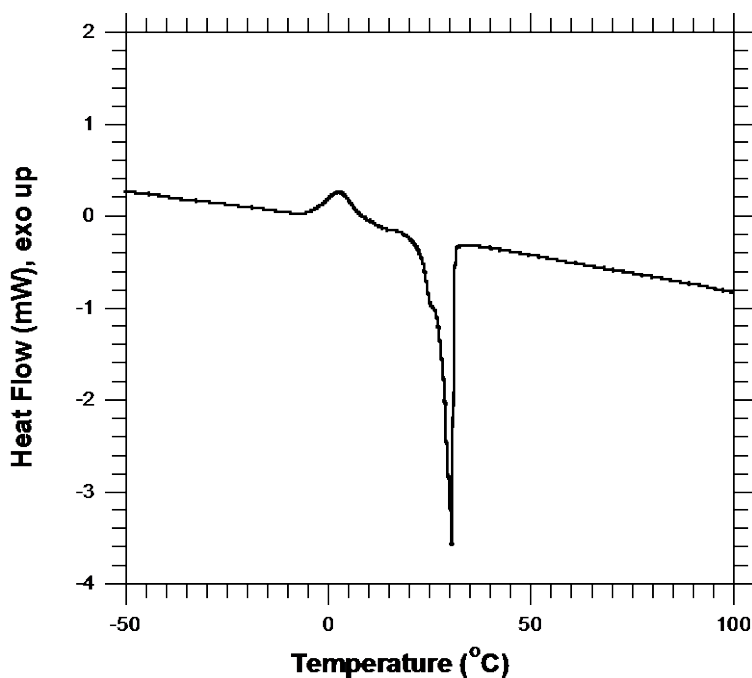

**Figure S6B.** The second heating DSC profile ( $2\text{ }^{\circ}\text{C/min}$ ) collected on dried (1-decyl-3-methylimidazolium chloride,  $\text{C}_{10}\text{mim}^+\text{Cl}^-$ . (Sample contained 2.0% (w/w)  $\text{H}_2\text{O}$  in the sample as determined by TGA.) Heating scan shows a  $T_m = 27.5\text{ }^{\circ}\text{C}$ .
